# Supplementary material
Source: Springer Nature journal article supplement (https://www.springermedizin.de/resource/supplementary/13054_2012_1709_MOESM2_ESM.pdf/9711274)

Records identified  
through database  
searching  
(n=799)

Records identified  
through other  
sources  
(n=4)

Records after duplicates  
removed  
(n=740)

Non relevant  
records  
excluded  
(n=710)

Full-text articles  
assessed for  
eligibility  
(n=30)

Full-text articles  
excluded<sup>\*</sup>  
(n=27)

Studies included  
in qualitative  
and quantitative  
synthesis  
(n=3)

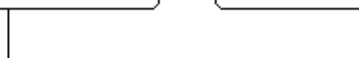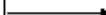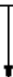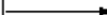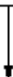

Supplement: MOESM2 [file 9711274]
